# Supplementary material for: Linking emotional valence and anxiety in a mouse insula-amygdala circuit
Source: PubMed Central journal article supplement (PMC10442438; doi:10.1038/s41467-023-40517-1), 2023-08-21
Supplement: 41467_2023_40517_MOESM3_ESM.pdf [file 41467_2023_40517_MOESM3_ESM.pdf]

## Description of Additional Supplementary Files

File Name: Supplementary Movie 1

Description: **aIC glutamatergic neuron activity in the elevated plus maze test (EPM)**. Real-time recording of calcium signal in aIC neurons of a representative mouse injected with AAV<sub>9</sub>-CaMKII $\alpha$ -GCaMP6f-WPRE in the aIC, during exploration of the EPM.

File Name: Supplementary Movie 2

Description: **aIC-BLA neuronal activity in the elevated plus maze test (EPM)**. Real-time recording of calcium signal in aIC-BLA neurons of a representative mouse injected with AAV<sub>9</sub>-syn-Flex-GCaMP6m-WPRE in the aIC and CAV2-Cre in the BLA, during exploration of the EPM.
